# Supplementary material
Source: publisher site journal article supplement (https://www.dovepress.com/get_supplementary_file.php?f=294916.docx)
Supplement: Supplementary file 1 [file get_supplementary_file.php]

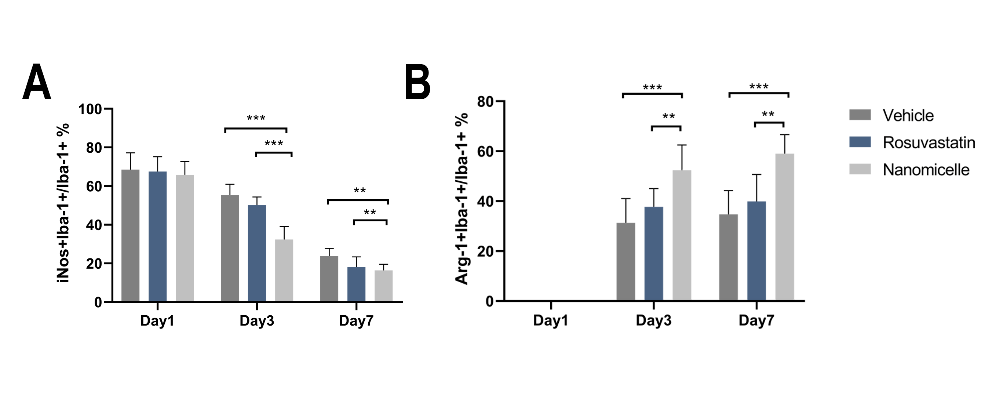


**Figure S1 (A)**Quantitative analysis was performed as percentage of iNOS+Iba-1+cells/Iba-1+cells in three groups. **(B)** Quantitative analysis was performed as percentage of Arg-1+Iba-1+ cells/Iba-1+cells in three groups. Data are mean ± SD, n = 4 mice per group, * P < 0.05, ** P<0.01, *** P < 0.001.


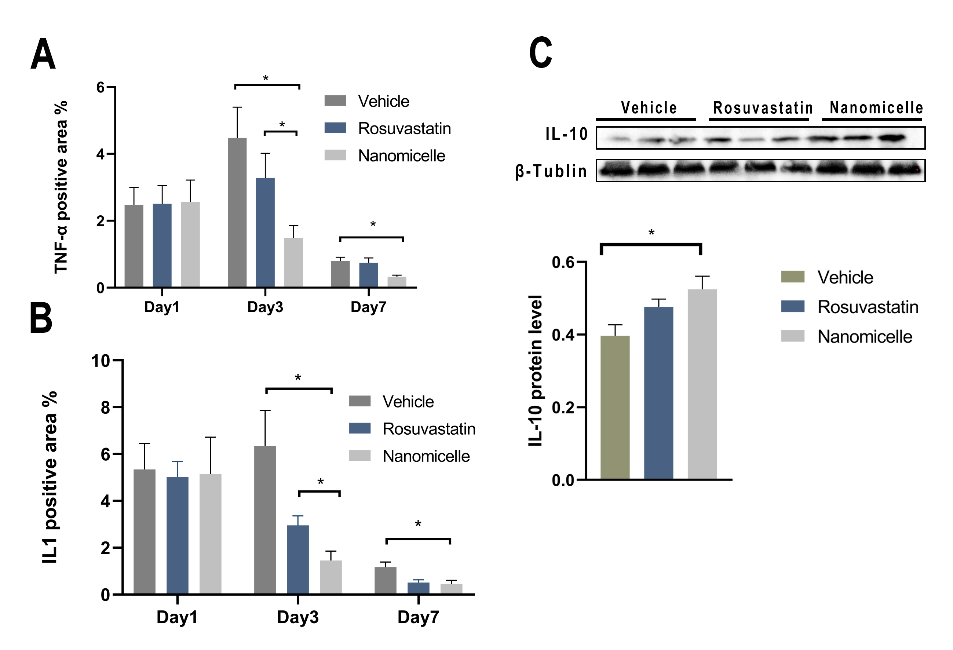


**Figure S2 (A)** The area percentage of IL-1β. **(B)** The area percentage of TNF-α.(C) Western blot analysis of IL-10 protein. Data are mean ± SD, n = 6 mice per group, * P < 0.05.
